# Supplementary material for: Influences on the Uptake of and Engagement With Health and Well-Being Smartphone Apps: Systematic Review
Source: PubMed Central journal article supplement (PMC7293059; doi:10.2196/17572), 2020-05-29

**Multimedia Appendix 1.** A visual representation of mapping of the COM-B model onto the Theoretical Domains Framework.

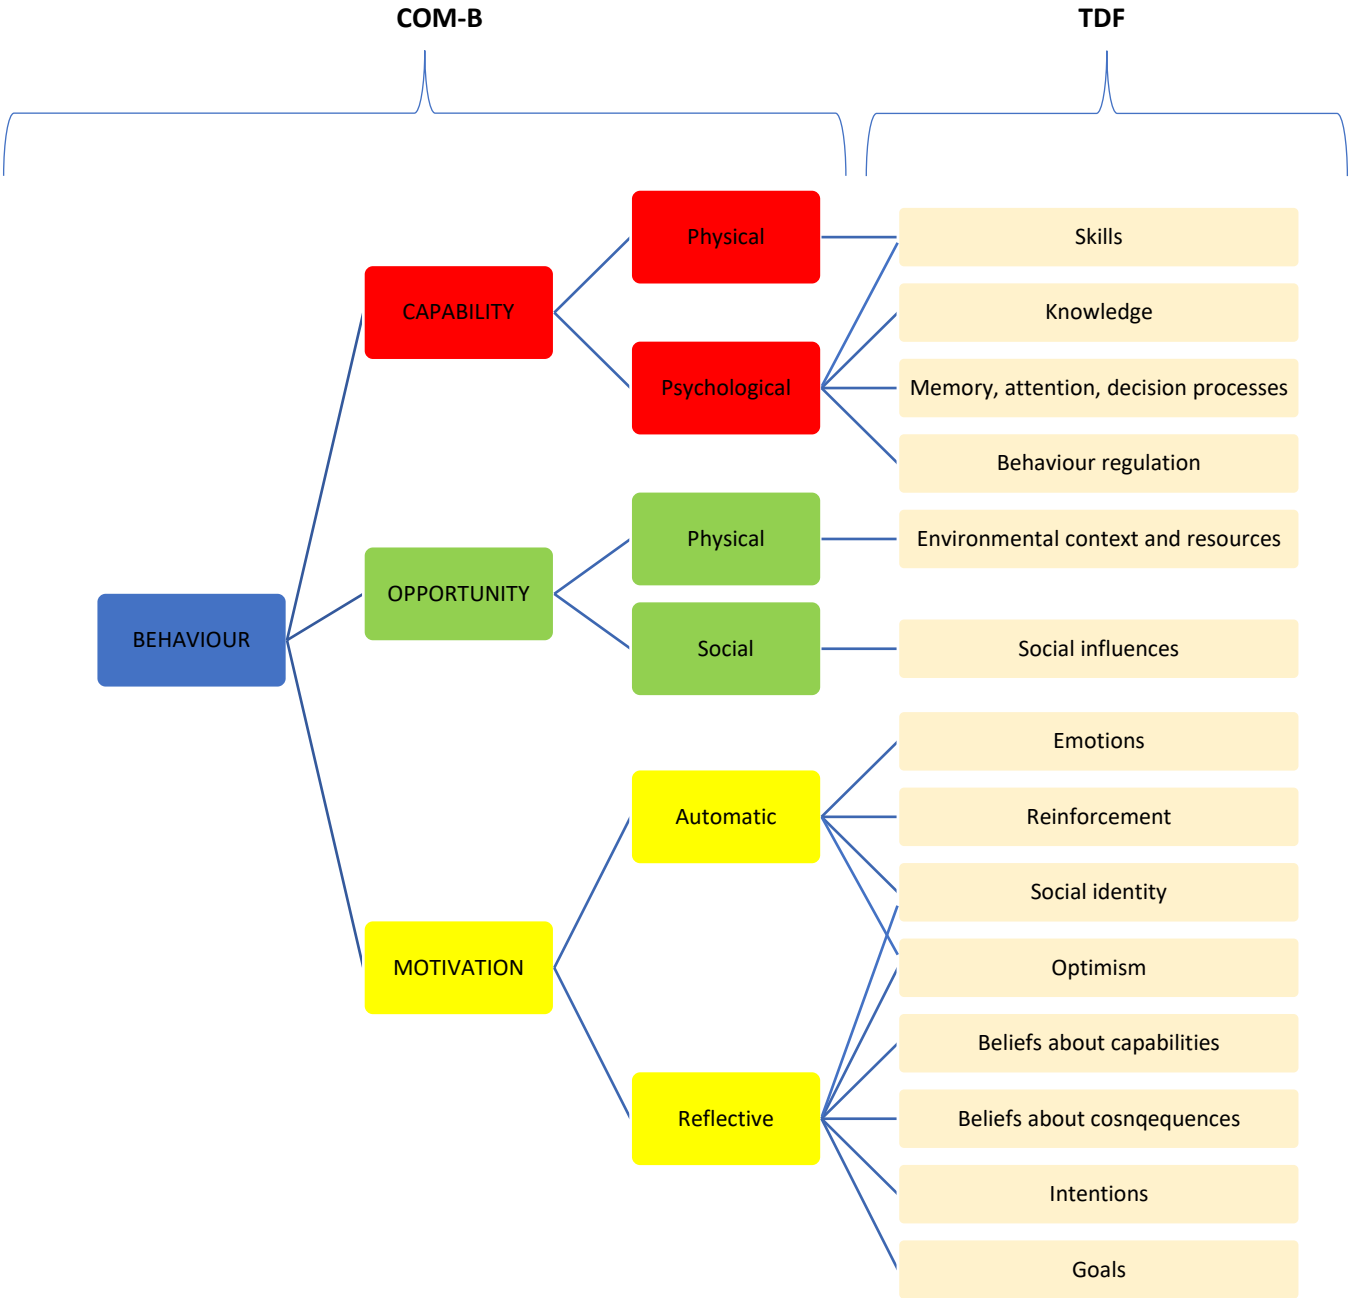

Supplement: jmir_v22i5e17572_app1.pdf [file jmir_v22i5e17572_app1.pdf]
