# Supplementary material for: Influences on the Uptake of and Engagement With Health and Well-Being Smartphone Apps: Systematic Review
Source: PubMed Central journal article supplement (PMC7293059; doi:10.2196/17572), 2020-05-29
Supplement: jmir_v22i5e17572_app3.pdf [file jmir_v22i5e17572_app3.pdf]

### Multimedia Appendix 3. Search strategy applied in MEDLINE:

1. MeSH: health promotion, health behaviour, health education (/explode), smoking cessation OR  
(Behaviour adj2 change) OR (Behavior adj2 change) OR (behaviour adj2 change adj2 technique\*) OR (behavior adj2 change adj2 technique\*) OR (behaviour change strategy\*) OR (behavior change strateg\*) OR health behaviour OR health behavior OR health education OR health promotion OR health prevent\* OR BCT\* OR behaviour\* intervention\* OR behaviour\* modification\* OR (health adj2 campaign\*) OR diet\* OR nutrition\* OR (healthy adj2 eating\*) OR exercise\* OR (physical adj2 activit\*) OR (physical adj2 inactivit\*) OR (alcohol adj2 misuse) OR drink\* OR (smok\* adj2 cessation) OR (stop adj2 smok\*)OR tobacco\* OR mood OR depress\* OR anxi\* OR wellbeing).ti,ab,kw.
2. MeSH: Mobile application (/explode) OR  
(Smartphone\* OR (mobile adj phone) (Smartphone\* adj2 app\*) OR (mobile adj2 app\*) OR mhealth OR (mobile adj2 technolog\*) OR (mobile adj2 tablet\*) OR (mobile adj2 health\*)).ti,ab,kw.
3. (uptake\* OR engage\* OR use\* OR adher\* OR enrol\* OR participat\* OR commitment OR connect\* OR download\* OR disconnect\* OR discontinue\* OR abandon\* OR disrupt\* OR interrupt\* OR quit\* OR terminate OR disengage\* OR detach\* OR withdraw\* OR usage\* OR pageview\* OR screenview\* OR login\* OR log-in\*).ti,ab,kw.
4. 1 AND 2 AND 3
