# Supplementary material for: Influences on the Uptake of and Engagement With Health and Well-Being Smartphone Apps: Systematic Review
Source: PubMed Central journal article supplement (PMC7293059; doi:10.2196/17572), 2020-05-29
Supplement: jmir_v22i5e17572_app4.pdf [file jmir_v22i5e17572_app4.pdf]

**Multimedia Appendix 4.** Characteristics of the studies included in the review: *Influences on the Uptake of and Engagement with Health and Well-being Smartphone Apps: A systematic Review*

| Studies                     | Location       | Study aim                                                                                     | App used (name if applicable)                      | Participants                                                                                                                                                                                                                                                 | Methods or design and analytic approach                                                                                                                                   |
|-----------------------------|----------------|-----------------------------------------------------------------------------------------------|----------------------------------------------------|--------------------------------------------------------------------------------------------------------------------------------------------------------------------------------------------------------------------------------------------------------------|---------------------------------------------------------------------------------------------------------------------------------------------------------------------------|
| Anderson et al 2016 [37]    | Australia      | To explore experiences of health app users                                                    | Nonspecific health apps                            | Adults in the general population; N=22; female n=15; age groups: 18-25 years, n=4; 26-35 years, n=13; 46-55 years, n=2; and ≥55 years, n=1                                                                                                                   | Semistructured interviews; thematic analysis                                                                                                                              |
| Attwood et al 2017 [38]     | United Kingdom | To examine patterns of app usage over time and to explore app users' views of the app         | Alcohol reduction (Drinkaware)                     | Existing app users; N=119,713, (interview participants N =21); female (%): 59.3, (interview part: 12); age groups: 31%, 35-44 years                                                                                                                          | Mixed methods approach (secondary data analysis of Drinkaware database and semistructured interviews); ANOVA <sup>a</sup> , regression, <i>t</i> test, framework analysis |
| Baretta et al. 2019 [39]    | Italy          | To examine users' need and preferences regarding their engagement with physical activity apps | Physical activity (Runtastic, Edumondo, Runkeeper) | Adults in the general population; N=20; female (%): 45; mean age 39.8 years (SD 7)                                                                                                                                                                           | Longitudinal, single-arm design with think-aloud methodology and interview techniques; thematic analysis                                                                  |
| Baskerville et al 2016 [40] | Canada         | To explore LGBTQ+ <sup>b</sup> communities' perception of a smoking cessation app             | Smoking cessation                                  | LGBTQ+ youth and adults; N focus groups=204; female (%): 39, male (%) 26.6, trans female (%): 3.7, trans male (%): 6.9, two spirit (%): 4.1, queer (%): 14.7, 0.5% intersex (%): 0.5, 4.6% other (%): 4.6; age groups: 8.8%, 16-18 years; 91.2%, 18-29 years | Focus groups (n=24); framework analysis                                                                                                                                   |
| Bender et al 2014 [41]      | United States  | To examine factors predicting uptake with health apps among ethnic minorities                 | Nonspecific health apps                            | Ethnic minorities in the United States (Caucasians, Latinos, and Koreans); N=904; female (%): 64.3; mean age 44 years (SD 16.1)                                                                                                                              | Cross-sectional survey; descriptives, regression                                                                                                                          |
| Bhuyan et al 2016 [42]      | United States  | To explore the use of mHealth <sup>c</sup> apps for health seeking behavior among US adults   | Nonspecific health apps                            | Adults in the general population; N=3677; female (%): 51.7; age groups: 30.8%, under 35 years; 17.2%, 35-44 years;                                                                                                                                           | Secondary data analysis of a nationally representative sample (Health Information National Trends Survey—cycle 4); descriptives, regression                               |

|                            |                |                                                                                                  |                                         |                                                                                                                                                                                                                                                                 |                                                                                                                               |
|----------------------------|----------------|--------------------------------------------------------------------------------------------------|-----------------------------------------|-----------------------------------------------------------------------------------------------------------------------------------------------------------------------------------------------------------------------------------------------------------------|-------------------------------------------------------------------------------------------------------------------------------|
|                            |                |                                                                                                  |                                         | 18.9%, 45-54 years;<br>15.8%, 55-64 years; 17.4<br>>65 years                                                                                                                                                                                                    |                                                                                                                               |
| Bidargaddi et al 2018 [43] | United States  | To assess the effectiveness of push notifications on engagement                                  | Well-being app (JOOL)                   | Existing app users; N=1255; female (%): 63.97; age groups: 28.86%, < 30 years; 42.44%, 30-50 years; 28.70%, > 50 years                                                                                                                                          | Microrandomized trial; regression                                                                                             |
| Carroll et al 2017 [44]    | United States  | To describe sociodemographic characteristics with health app use, predictors of health app use   | Nonspecific health apps                 | Adults in the general population; N=3519; female (%): 51.62; age groups: 65.62%, 18-44 years; 34.38%, > 45 years                                                                                                                                                | Secondary data analysis of a nationally representative sample (Health Information National Trends Survey—cycle 4); regression |
| Casey et al 2014 [45]      | Ireland        | To explore patients views of using a smartphone app to promote physical activity in primary care | Physical activity (SMART MOVE)          | Adult patients in primary care; N=1255; female (%): 75%; mean age 42 years (age range 17-62)                                                                                                                                                                    | Semistructured interviews; framework analysis                                                                                 |
| Crane et al 2017 [46]      | United Kingdom | To understand the usability of the app                                                           | Alcohol reduction (Drink Less)          | Adult excessive drinkers and users of the Drink Less app; N=24; female (%): 50; mean age (think-aloud) 42 years; mean age (interviews) 40 years                                                                                                                 | Think-aloud and semistructured interviews; thematic analysis                                                                  |
| Gorton et al 2011 [47]     | New Zealand    | To explore a potential weight loss management intervention on smartphone                         | Weight management                       | Adults in the general population; N=306 (focus groups N=54); % female (% survey): 77 (% focus group: 76); age groups (survey): 20%, 16-30 years; 51%, 31-50 years; 28%, ≥51 years; age groups (focus group): 35%, 16-30 years; 50%, 31-50 years; 15%, ≥51 years | Mixed methods approach (cross-sectional survey and focus groups [n=10]); descriptives, thematic analysis                      |
| Gowin et al 2015 [48]      | United States  | To describe the use of health apps among students                                                | Weight management and physical activity | College students; N=27; female (%): 78; age groups: 70%, 18-20 years; 22%, 21-23 years; 8%, 24-26 years                                                                                                                                                         | Semistructured interviews; grounded theory                                                                                    |

|                                |                |                                                                                                                                                                                                                                         |                                  |                                                                                                                            |                                                                                     |
|--------------------------------|----------------|-----------------------------------------------------------------------------------------------------------------------------------------------------------------------------------------------------------------------------------------|----------------------------------|----------------------------------------------------------------------------------------------------------------------------|-------------------------------------------------------------------------------------|
| Guertler et al 2015 [49]       | Australia      | To examine the engagement with physical activity promotion app and identify sociodemographic factors of nonengagement                                                                                                                   | Physical activity (10,000 steps) | App users, N=1451; female (%): 72.43; mean age 38.3 years (SD 11.1)                                                        | Secondary data analysis of the 10,000 Steps database; ANOVA, chi-square, regression |
| Laurie and Blandford 2016 [50] | United Kingdom | To understand users' experiences with mindfulness app                                                                                                                                                                                   | Mindfulness (Headspace)          | Adults in the general population; N=16; % female (%): 68.75; mean age, 32.5 years (age range 25-38)                        | Semistructured interviews; grounded theory                                          |
| Lieffers et al 2018 [51]       | Canada         | To understand the experiences of adults who have used a nutrition app previously                                                                                                                                                        | Weight management                | Adults in the general population; N=24; % female (%), 79; age groups: 63%, 18-30 years; 25%, 31-50 years; 13%, 51-70 years | Semistructured interviews; content analysis                                         |
| Ly et al 2014 [52]             | Sweden         | To explore participants' views of a mental health app                                                                                                                                                                                   | Depression                       | Adults with major depression; N=12; female (%): 50; mean age 37.9 years (age range 21-59)                                  | In-depth interviews; thematic analysis                                              |
| Mackert et al 2016 [53]        | United States  | To determine the association between health literacy and app engagement                                                                                                                                                                 | Fitness and weight management    | Adults in the general population; N=4974; female (%): 57.74; mean age 43.5 years (SD=16.7)                                 | Cross-sectional survey; cross-tabulation analysis, regression                       |
| Milward et al 2018 [54]        | United Kingdom | To understand why and how participants engaged with the app, to understand facilitators and barriers to engagement with the app, to understand how the app impacted drinking behavior, and to identify typologies of users (engagement) | Alcohol reduction (BRANCH)       | Participants of a randomized controlled trial; N=20, female (%): 80; mean age 24 years (SD=3)                              | Semistructured interviews; framework analysis                                       |

|                          |                |                                                                                                                         |                                          |                                                                                                                                                                                                                                                                                                                                 |                                                                                                                        |
|--------------------------|----------------|-------------------------------------------------------------------------------------------------------------------------|------------------------------------------|---------------------------------------------------------------------------------------------------------------------------------------------------------------------------------------------------------------------------------------------------------------------------------------------------------------------------------|------------------------------------------------------------------------------------------------------------------------|
| Mitchell et al 2017 [55] | Canada         | To evaluate uptake with a loyalty points–based health app and to describe sociodemographic characteristics of the users | Multipurpose health app (Carrot Rewards) | App users; N=57,885; % female, 62.96%; age groups: 2.4%, 13-17 years; 20.65%, 18-24 years; 33.69%, 25-34 years; 20.11%, 35-44 years; 13.17%, 45-54 years; 7.22%, 55-64 years; 2.74% >65 years                                                                                                                                   | Process evaluation; descriptives                                                                                       |
| Peng et al 2016a [56]    | United States  | To better understand a more diverse pool of users' perception of health apps                                            | Nonspecific health apps                  | Adults in the general population; N=44; female (%): 65; mean age 37.2 years (SD 15.7)                                                                                                                                                                                                                                           | Focus groups (n=6) and interviews (n=5); thematic analysis                                                             |
| Peng et al 2016b [57]    | United States  | To explore the perception of rural adults with diabetes regarding apps to manage their condition                        | Nonspecific health apps                  | Adults with diabetes; N=18; female (%): 72.2; mean age 54 years (SD 12.7)                                                                                                                                                                                                                                                       | Focus groups (n=4); thematic analysis                                                                                  |
| Perski et al 2017 [58]   | United Kingdom | To explore participants' choices of health apps and to identify important features of engagement                        | Smoking cessation and alcohol reduction  | Adults in the general population; N=20; % female (%): 60; mean age (SD), 29.7 (SD 9.2) years                                                                                                                                                                                                                                    | Think-aloud and semistructured interviews; thematic analysis                                                           |
| Perski et al 2018 [59]   | United Kingdom | To explore the more important features of engagement                                                                    | Alcohol reduction                        | Adults in the general population; N=132 (focus group: n=9); female (%): 49.2 (focus group %: 77.8); age groups (survey): 10.6%, 18-24 years; 24.2%, 25-34 years; 34.1%, 35-44 years; 21.2%, 45-54 years; 6.8%, 55-64 years; 3%, ≥65 years; age groups (focus group): 44.4%, 18-24 years; 33.3%, 25-34 years; 22.2%, 45-54 years | Mixed methods approach (Web-based survey and focus groups, n=3); interclass correlation coefficient, thematic analysis |
| Peters et al 2018 [60]   | Australia      | To explore participants' preferences of a mental health app                                                             | Well-being                               | Adult workers of male-dominated industry; N=60; female (%): 8%; Mean age 47 years (age range 26-65)                                                                                                                                                                                                                             | Participatory study: workshops (n=6); thematic analysis                                                                |

|                             |                |                                                                                                                                                                                                            |                                     |                                                                                                                                                 |                                                                                                                                          |
|-----------------------------|----------------|------------------------------------------------------------------------------------------------------------------------------------------------------------------------------------------------------------|-------------------------------------|-------------------------------------------------------------------------------------------------------------------------------------------------|------------------------------------------------------------------------------------------------------------------------------------------|
| Pung et al 2018 [61]        | Australia      | To explore mobile app use among patients with depressive symptoms                                                                                                                                          | Depression                          | Patients of primary care presenting depressive symptoms; N=16; % female (%): 58; age groups: 19%, <25 years; 44%, 25-44 years; 38%, 45-65 years | Semistructured interviews; thematic analysis                                                                                             |
| Puszkiewitz et al 2016 [62] | United Kingdom | To assess cancer survivors' attitudes toward a physical activity app, to understand how the app could be adapted to their needs, to understand how to increase their physical activity level using the app | Physical activity                   | Adult cancer survivors; N=11; female (%): 89; mean age 45 years (SD=9.4)                                                                        | Mixed methods approach (1-arm pre-post design and semistructured interviews); Wilcoxon sign rank test; thematic analysis                 |
| Serrano et al 2017 [63]     | United States  | To explore features of the app that influence engagement and to describe the characteristics of the users                                                                                                  | Weight loss app (Lose it!)          | App users; N=1,011,008                                                                                                                          | Secondary data analysis of a cross-sectional data; Classification and Regression Tree analysis, descriptives, regression                 |
| Sharpe et al 2018 [64]      | United States  | To determine factors associated with uptake of an alcohol reduction app among persons living with HIV                                                                                                      | Alcohol reduction                   | Adult population living with HIV; N=757; female (%): 35; age groups: 18%, 18-34 years; 20%, 35-44 years; 41%, 45-54 years; 21%, ≥55 years       | Secondary data analysis of a cross-sectional survey data of a longitudinal cohort study (Florida cohort study); descriptives, regression |
| Smahel et al 2017 [65]      | Czech Republic | To reveal characteristics regarding use of health apps                                                                                                                                                     | Fitness and weight management       | Adults of the general population; N=406; female (%): 86.9; mean age 23.8 years (SD=5.3)                                                         | Cross-sectional survey; descriptives, regression                                                                                         |
| Solbrig et al 2016 [66]     | United Kingdom | To explore experiences and wishes regarding weight management using apps                                                                                                                                   | Weight management (FIT)             | Adults of the general population; N=24; female (%): 79.2; mean age 30 years (age range 19-70)                                                   | Focus groups (n=6); thematic analysis                                                                                                    |
| Struik et al 2018 [67]      | Canada         | To understand the interaction and experiences with the app                                                                                                                                                 | Smoking cessation (Crush the Crave) | App users; N=31; female (%): 42; mean age 24 years (SD=2.72)                                                                                    | Semistructured interviews; framework analysis                                                                                            |

|                                                 |                |                                                                                                                     |                                                                |                                                                                                                                                                                   |                                                                                             |
|-------------------------------------------------|----------------|---------------------------------------------------------------------------------------------------------------------|----------------------------------------------------------------|-----------------------------------------------------------------------------------------------------------------------------------------------------------------------------------|---------------------------------------------------------------------------------------------|
| Sun et al 2017 [68]                             | China          | To investigate the current usage, willingness to use, and barriers to use a physical activity app                   | Physical activity                                              | Adult patients with chronic disease; N=218; female (%): 61; mean age 44.6 years (age range 20-69)                                                                                 | Cross-sectional survey; descriptives, chi-square                                            |
| Switsers et al 2018 [69]                        | Belgium        | To examine the needs of adults with bipolar disorder regarding apps                                                 | Mental health                                                  | Adults with bipolar disorder; N=16; female (%): 56.3; mean age 41.8 years (age range 21-69)                                                                                       | Focus groups (n=7); thematic analysis                                                       |
| Taki et al 2019 [70]                            | Australia      | To examine how app characteristics influence engagement                                                             | Weight management (GH <sup>d</sup> )                           | Female app users; N=18, mean age 30.9 years (age range 21-38)                                                                                                                     | Semistructured interviews; thematic analysis                                                |
| Tang et al 2015 [71]                            | United Kingdom | To explore young adults' experiences of using apps                                                                  | Weight management                                              | Adults of the general population; N=19; female (%): 47.37; age range 19-33 years                                                                                                  | Semistructured interviews; thematic analysis                                                |
| Tudor-Sfetea et al 2018 [72]                    | United Kingdom | To explore individuals' perceptions of different smoking cessation apps                                             | Smoking cessation (Quit Genius and NHS <sup>e</sup> Smokefree) | App users; N=15 (Quit Genius) and N=14 (NHS Smokefree); female (%): 13.3 (Quit Genius) and 14.3 (NHS Smokefree); mean age 25.07 years (Quit Genius) and 24.21 years (Quit Genius) | Semistructured interviews; thematic analysis                                                |
| Wang et al 2018 [73]                            | China          | To explore app engagement and to understand people's views about app containing health information                  | Pregnancy health apps                                          | Pregnant women from secondary care; focus groups N=28, mean age 29.6 years (SD=3.1); survey N=535, mean age 30.6 years (SD=3.6)                                                   | Survey and focus groups (n=4); descriptives, logistic regression, thematic analysis         |
| Webcredible Report, 2016 (unknown authors) [74] | United Kingdom | To understand why people use health apps, how they choose them, what factors influences their choice and engagement | Nonspecific health apps                                        | Adults in the general population; N=300 (focus group: n=12); female (%): 42; age range 33-60 years                                                                                | Mixed methods approach. (Web-based survey and focus groups [n=2]); analysis used unreported |
| Woldaregay et al [75]                           | Norway         | To explore motivational factors of user engagement with health apps                                                 | Nonspecific health apps                                        | Adults of the general population; N=16; female (%): 50; Age range 21-55 years                                                                                                     | Semistructured interviews; thematic analysis                                                |

|                         |               |                                                                                      |                               |                                                                                                                                                 |                                                                                                    |
|-------------------------|---------------|--------------------------------------------------------------------------------------|-------------------------------|-------------------------------------------------------------------------------------------------------------------------------------------------|----------------------------------------------------------------------------------------------------|
| Xie et al<br>2018 [76]  | China         | To examine the prevalence, extent, and demographics of health app use                | Nonspecific health apps       | Adults of the general population; N=633; female (%): 48.5; age groups: 24.6%, 18-29 years; 25%, 30-44 years; 24.6%, 45-59 years; 25%, ≥60 years | Cross-sectional survey; descriptives, regression                                                   |
| Zeng et al<br>2015 [77] | United States | To examine demographical, psychological, and behavioral predictors of the use of app | Smoking cessation (SmartQuit) | App users; N=98; female (%): 53; mean age 41.5 years (SD=12)                                                                                    | Secondary data analysis of the SmartQuit trial's data (intervention arm); descriptives, regression |

<sup>a</sup>ANOVA: analysis of variance.

<sup>b</sup>LGBTQ+: lesbian, gay, bisexual, transgender, queer, and other spectrum of sexuality and gender.

<sup>c</sup>mHealth: mobile health.

<sup>d</sup>GH: Growing Healthy.

<sup>e</sup>NHS: National Health Service.

## References

38. Attwood S, Parke H, Larsen J, Morton KL. Using a mobile health application to reduce alcohol consumption: a mixed-methods evaluation of the drinkaware track & calculate units application. *BMC Public Health* 2017;17(1):394. PMID: 28511698
39. Baretta D, Perski O, Steca P. Exploring Users' Experiences of the Uptake and Adoption of Physical Activity Apps: Longitudinal Qualitative Study. *JMIR Mhealth Uhealth* 2019;7(2):e11636 doi: 10.2196/11636. PMID: 30735143
40. Baskerville NB, Dash D, Wong K, Shuh A, Abramowicz A. Perceptions Toward a Smoking Cessation App Targeting LGBTQ+ Youth and Young Adults: A Qualitative Framework Analysis of Focus Groups. *JMIR Public Health and Surveillance* 2016;2(2):e165. PMID: 27864164
41. Bender MS, Choi J, Arai S, Paul SM, Gonzalez P, Fukuoka Y. Digital technology ownership, usage, and factors predicting downloading health apps among caucasian, filipino, korean, and latino americans: the digital link to health survey. *JMIR MHealth and UHealth* 2014;2(4):e43. PMID: 25339246
42. Bhuyan SS, Lu N, Chandak A, et al. Use of Mobile Health Applications for Health-Seeking Behavior Among US Adults. *Journal of Medical Systems* 2016;40(6):153. PMID: 27147516
43. Bidargaddi N, Almirall D, Murphy S, et al. To Prompt or Not to Prompt? A Microrandomized Trial of Time-Varying Push Notifications to Increase Proximal Engagement With a Mobile Health App. *JMIR Mhealth Uhealth* 2018;6(11):e10123 doi: 10.2196/10123. PMID: 30497999
44. Carroll JK, Moorhead A, Bond R, LeBlanc WG, Petrella RJ, Fiscella K. Who Uses Mobile Phone Health Apps and Does Use Matter? A Secondary Data Analytics Approach. *Journal of medical Internet research* 2017;19(4):e125. PMID: 28428170
45. Casey M, Hayes PS, Glynn F, et al. Patients' experiences of using a smartphone application to increase physical activity: the SMART MOVE qualitative study in primary care. *British Journal of General Practice* 2014;64(625):e500-8. PMID: 25071063
46. Crane D, Garnett C, Brown J, West R, Michie S. Factors Influencing Usability of a Smartphone App to Reduce Excessive Alcohol Consumption: Think Aloud and Interview Studies. *Frontiers in Public Health* 2017;5:39. PMID: 28421175

47. Gorton D, Dixon R, Maddison R, Mhurchu CN, Jull A. Consumer views on the potential use of mobile phones for the delivery of weight-loss interventions. *J Hum Nutr Diet* 2011;24(6):616-9 doi: 10.1111/j.1365-277X.2011.01163.x. PMID: 21781188
48. Gowin M, Cheney M, Gwin S, Franklin Wann T. Health and Fitness App Use in College Students: A Qualitative Study. *American Journal of Health Education* 2015;46(4):223-30 doi: 10.1080/19325037.2015.1044140. PMID:
49. Guertler D, Vandelanotte C, Kirwan M, Duncan MJ. Engagement and Nonusage Attrition With a Free Physical Activity Promotion Program: The Case of 10,000 Steps Australia. *Journal of medical Internet research* 2015;17(7):e176. PMID: 26180040
50. Laurie J, Blandford A. Making time for mindfulness. *International Journal of Medical Informatics* 2016;96:38-50.
51. Lieffers JRL, Arocha JF, Grindrod K, Hanning RM. Experiences and Perceptions of Adults Accessing Publicly Available Nutrition Behavior-Change Mobile Apps for Weight Management. *Journal of the Academy of Nutrition & Dietetics* 2018;118(2):229-39.e3. PMID: 28625662
52. Ly KH, Janni E, Wrede R, et al. Experiences of a guided smartphone-based behavioral activation therapy for depression: A qualitative study. *Internet Interventions* 2015;2(1):60-68.
53. Mackert M, Mabry-Flynn A, Champlin S, Donovan EE, Pounders K. Health Literacy and Health Information Technology Adoption: The Potential for a New Digital Divide. *Journal of medical Internet research* 2016;18(10):e264. PMID: 27702738
54. Milward J, Deluca P, Drummond C, Kimergård A. Developing Typologies of User Engagement With the BRANCH Alcohol-Harm Reduction Smartphone App: Qualitative Study. *JMIR Mhealth Uhealth* 2018;6(12):e11692 doi: 10.2196/11692. PMID: 30545806
55. Mitchell M, White L, Oh P, et al. Uptake of an Incentive-Based mHealth App: Process Evaluation of the Carrot Rewards App. *JMIR MHealth and UHealth* 2017;5(5):e70. PMID: 28559224
56. Peng W, Kanthawala S, Yuan S, Hussain SA. A qualitative study of user perceptions of mobile health apps. *BMC public health* 2016;16(1):1158. PMID: 27842533
57. Peng W, Yuan S, Holtz BE. Exploring the Challenges and Opportunities of Health Mobile Apps for Individuals with Type 2 Diabetes Living in Rural Communities. *Telemedicine journal and e-health : the official journal of the American Telemedicine Association* 2016;22(9):733-38. PMID: 26982017
58. Perski O, Blandford A, Ubhi HK, West R, Michie S. Smokers' and drinkers' choice of smartphone applications and expectations of engagement: a think aloud and interview study. *BMC medical informatics and decision making* 2017;17(1):25. PMID: 28241759
59. Perski O, Baretta D, Blandford A, West R, Michie S. Engagement features judged by excessive drinkers as most important to include in smartphone applications for alcohol reduction: A mixed-methods study. *DIGITAL HEALTH* 2018;4:2055207618785841 doi: 10.1177/2055207618785841. PMID: 31463077
60. Peters D, Deady M, Glozier N, Harvey S, Calvo RA. Worker Preferences for a Mental Health App Within Male-Dominated Industries: Participatory Study. *JMIR Mental Health* 2018;5(2):e30. PMID: 29695371
61. Pung A, Fletcher SL, Gunn JM. Mobile App Use by Primary Care Patients to Manage Their Depressive Symptoms: Qualitative Study. *Journal of Medical Internet Research* 2018;20(9):e10035. PMID: 30262449
62. Puskiewicz P, Roberts AL, Smith L, Wardle J, Fisher A. Assessment of Cancer Survivors' Experiences of Using a Publicly Available Physical Activity Mobile Application. *JMIR Cancer* 2016;2(1):e7. PMID: 28410168
63. Serrano KJ, Coa KI, Yu M, Wolff-Hughes DL, Atienza AA. Characterizing user engagement with health app data: a data mining approach. *Translational Behavioral Medicine* 2017;7(2):277-85. PMID: 28616846
64. Sharpe EE, Karasouli E, Meyer C. Examining Factors of Engagement With Digital Interventions for Weight Management: Rapid Review. *JMIR Research Protocols* 2017;6(10):e205. PMID: 29061557
65. Smahel D, Elavsky S, Machackova H. Functions of mHealth applications: A user's perspective. *Health Informatics Journal* 2017;1460458217740725. PMID: 29121831



66. Solbrig L, Jones R, Kavanagh D, May J, Parkin T, Andrade J. People trying to lose weight dislike calorie counting apps and want motivational support to help them achieve their goals. *Internet Interventions* 2017;7:23-31. PMID: 28286739
67. Struik LL, Botorff JL, Baskerville NB, Oliffe JL. The Crush the Crave Quit Smoking App and Young Adult Smokers: Qualitative Case Study of Affordances. *JMIR MHealth and UHealth* 2018;6(6):e134. PMID: 29884602
68. Sun L, Wang Y, Greene B, et al. Facilitators and barriers to using physical activity smartphone apps among Chinese patients with chronic diseases. *BMC medical informatics and decision making* 2017;17(1):44. PMID: 28420355
69. Switsers L, Dauwe A, Vanhoudt A, Van Dyck H, Lombaerts K, Oldenburg J. Users' Perspectives on mHealth Self-Management of Bipolar Disorder: Qualitative Focus Group Study. *JMIR MHealth and UHealth* 2018;6(5):e108. PMID: 29720363
70. Taki S, Russell CG, Lymer S, et al. A Mixed Methods Study to Explore the Effects of Program Design Elements and Participant Characteristics on Parents' Engagement With an mHealth Program to Promote Healthy Infant Feeding: The Growing Healthy Program.
71. Tang J, Abraham C, Stamp E, Greaves C. How can weight-loss app designers' best engage and support users? A qualitative investigation. *British journal of health psychology* 2015;20(1):151-71 doi: 10.1111/bjhp.12114. PMID: 25130682
72. Tudor-Sfetea C, Rabee R, Najim M, et al. Evaluation of Two Mobile Health Apps in the Context of Smoking Cessation: Qualitative Study of Cognitive Behavioral Therapy (CBT) Versus Non-CBT-Based Digital Solutions. *JMIR MHealth and UHealth* 2018;6(4):e98. PMID: 29669708
73. Wang N, Deng Z, Wen LM, Ding Y, He G. Understanding the Use of Smartphone Apps for Health Information Among Pregnant Chinese Women: Mixed Methods Study. *JMIR Mhealth Uhealth* 2019;7(6):e12631 doi: 10.2196/12631. PMID: 31215516
74. Webcredible. Presentation of their findings on digital healthcare for Public Health England (PHE). Unpublished., 2016.
75. Woldaregay AZ, Issom DZ, Henriksen A, et al. Motivational Factors for User Engagement with mHealth Apps. *Studies in health technology and informatics* 2018;249:151-57. PMID: 29866972
76. Xie Z, Nacioglu A, Or C. Prevalence, Demographic Correlates, and Perceived Impacts of Mobile Health App Use Amongst Chinese Adults: Cross-Sectional Survey Study. *JMIR MHealth and UHealth* 2018;6(4):e103. PMID: 29699971
77. Zeng EY, Vilardaga R, Heffner JL, Mull KE, Bricker JB. Predictors of Utilization of a Novel Smoking Cessation Smartphone App. *Telemedicine journal and e-health : the official journal of the American Telemedicine Association* 2015;21(12):998-1004. PMID: 26171733 *Frontiers in endocrinology* 2019;10:397-97 doi: 10.3389/fendo.2019.00397. PMID: 31293515
