# Supplementary material for: Influences on the Uptake of and Engagement With Health and Well-Being Smartphone Apps: Systematic Review
Source: PubMed Central journal article supplement (PMC7293059; doi:10.2196/17572), 2020-05-29
Supplement: jmir_v22i5e17572_app5.pdf [file jmir_v22i5e17572_app5.pdf]

**Multimedia Appendix 5.** Critical appraisal of the methodological quality of included studies

| 1. Qualitative studies |       |          |       |        |            |            |            |
|------------------------|-------|----------|-------|--------|------------|------------|------------|
| First author           | Year  | Citation | Q 1.1 | Q 1.2. | Q 1.3.     | Q 1.4.     | Q 1.5.     |
| Anderson               | 2016  |          | Yes   | Yes    | Yes        | Yes        | Yes        |
| Attwood*               | 2016  |          | Yes   | Yes    | Yes        | Yes        | Yes        |
| Baretta                | 2019  |          | Yes   | Yes    | Yes        | Yes        | Yes        |
| Baskerville            | 2016  |          | Yes   | Yes    | Yes        | Yes        | Yes        |
| Casey                  | 2014  |          | Yes   | Yes    | Yes        | Yes        | Can't tell |
| Crane                  | 2017  |          | Yes   | Yes    | Yes        | Yes        | Yes        |
| Gorton*                | 2011  |          | Yes   | Yes    | Can't tell | No         | Yes        |
| Gowin                  | 2015  |          | Yes   | Yes    | Yes        | Yes        | Yes        |
| Laurie                 | 2016  |          | Yes   | Yes    | Yes        | Yes        | Yes        |
| Lieffers               | 2018  |          | Yes   | Yes    | Yes        | Can't tell | Yes        |
| Ly                     | 2014  |          | Yes   | Yes    | Yes        | Yes        | Yes        |
| Milward                | 2018  |          | Yes   | Yes    | Yes        | Yes        | Yes        |
| Peng                   | 2016a |          | Yes   | Yes    | Yes        | Yes        | Yes        |
| Peng                   | 2016b |          | Yes   | Yes    | Yes        | Yes        | Yes        |
| Perski                 | 2017  |          | Yes   | Yes    | Yes        | Yes        | Yes        |
| Perski*                | 2018  |          | Yes   | Yes    | Yes        | Yes        | Yes        |
| Peters                 | 2018  |          | Yes   | Yes    | Yes        | Can't tell | Yes        |
| Pung                   | 2018  |          | Yes   | Yes    | Yes        | Yes        | Yes        |
| Puszkiewitz*           | 2016  |          | Yes   | Yes    | Yes        | Yes        | Yes        |
| Solbrig                | 2016  |          | Yes   | Yes    | Yes        | Yes        | Yes        |
| Struik                 | 2018  |          | Yes   | Yes    | Yes        | Yes        | Yes        |
| Sun                    | 2017  |          |       |        |            |            |            |
| Switsers               | 2018  |          | Yes   | Yes    | Yes        | Yes        | Yes        |
| Taki*                  | 2019  |          | Yes   | Yes    | Yes        | Yes        | Yes        |
| Tang                   | 2015  |          | Yes   | Yes    | Yes        | Yes        | Yes        |
| Tudor-Sfetea           | 2018  |          | Yes   | Yes    | Yes        | Yes        | Yes        |
| Wang*                  | 2018  |          | Yes   | Yes    | Yes        | Yes        | Yes        |
| Webcredible*           | 2016  |          | Yes   | Yes    | Can't tell | Can't tell | Yes        |
| Woldaregay             | 2018  |          | Yes   | Yes    | Yes        | Can't tell | Yes        |

Q 1.1. Is the qualitative approach appropriate to answer the research question?

Q 1.2. Are the qualitative data collection methods adequate to address the research question?

Q 1.3. Are the findings adequately derived from the data?

Q 1.4. Is the interpretation of results sufficiently substantiated by data?

Q 1.5. Is there coherence between qualitative data sources, collection, analysis and interpretation?

## 2. Randomised control trials

| First author | Year | Citation | Q 2.1. | Q 2.2.     | Q 2.3. | Q 2.4. | Q 2.5. |
|--------------|------|----------|--------|------------|--------|--------|--------|
| Bidergaddi   | 2018 |          | Yes    | Can't tell | Yes    | Yes    | Yes    |

Q 2.1. Is randomization appropriately performed?

Q 2.2. Are the groups comparable at baseline?

Q 2.3. Are there complete outcome data?

Q 2.4. Are outcome assessors blinded to the intervention provided?

Q 2.5. Did the participants adhere to the assigned intervention?

## 3. Non-randomised studies

| First author | Year | Citation | Q 3.1.     | Q 3.2. | Q 3.3. | Q 3.4.     | Q 3.5.     |
|--------------|------|----------|------------|--------|--------|------------|------------|
| Attwood*     | 2016 |          | Yes        | Yes    | Yes    | Can't tell | Yes        |
| Bhuyan       | 2016 |          | Yes        | No     | Yes    | Can't tell | Can't tell |
| Carroll      | 2017 |          | Yes        | Yes    | Yes    | Yes        | Yes        |
| Guertler     | 2015 |          | Yes        | Yes    | Yes    | Can't tell | Yes        |
| Puszkiewitz* | 2016 |          | Yes        | Yes    | Yes    | Yes        | Yes        |
| Serrano      | 2017 |          | Yes        | Yes    | Yes    | Yes        | Yes        |
| Sharpe       | 2018 |          | Can't tell | Yes    | Yes    | Can't tell | Yes        |
| Zeng         | 2015 |          | Yes        | Yes    | Yes    | Yes        | Yes        |

Q 3.1. Are the participants representative of the target population?

Q 3.2. Are measurements appropriate regarding both the outcome and intervention (or exposure)?

Q 3.3. Are there complete outcome data?

Q 3.4. Are the confounders accounted for in the design and analysis?

Q 3.5. During the study period, is the intervention administered (or exposure occurred) as intended?

## 4. Quantitative descriptive studies

| First author | Year | Citation | Q 4.1.     | Q 4.2.     | Q 4.3.     | Q 4.4.     | Q 4.5.     |
|--------------|------|----------|------------|------------|------------|------------|------------|
| Bender       | 2014 |          | Yes        | Yes        | Can't tell | Yes        | Yes        |
| Gorton*      | 2011 |          | Yes        | Can't tell | Yes        | Can't tell | Yes        |
| Mackert      | 2016 |          | Can't tell | No         | Yes        | Yes        | Yes        |
| Mitchell     | 2017 |          | Yes        | Yes        | Yes        | Yes        | Yes        |
| Perski*      | 2018 |          | Yes        | Can't tell | Yes        | Yes        | Yes        |
| Smahel       | 2017 |          | Can't tell | Can't tell | Yes        | Can't tell | Yes        |
| Sun          | 2017 |          | Yes        | Yes        | Yes        | Yes        | Yes        |
| Taki*        | 2019 |          | Yes        | Yes        | Yes        | Can't tell | Can't tell |
| Wang*        | 2018 |          | Yes        | Yes        | Yes        | Yes        | Yes        |
| Webcredible* | 2016 |          | Yes        | Yes        | Yes        | Can't tell | Can't tell |
| Xie          | 2018 |          | Can't tell | Yes        | Yes        | Yes        | Yes        |

Q 4.1. Is the sampling strategy relevant to address the research question?

Q 4.2. Is the sample representative of the target population?

Q 4.3. Are the measurements appropriate?

Q 4.4. Is the risk of nonresponse bias low?

Q 4.5. Is the statistical analysis appropriate to answer the research question?

## 5. Mixed methods studies

| First author | Year | Citation | Q 5.1. | Q 5.2.     | Q 5.3.     | Q 5.4.     | Q 5.5.     |
|--------------|------|----------|--------|------------|------------|------------|------------|
| Attwood*     | 2016 |          | Yes    | Yes        | Yes        | Yes        | Yes        |
| Gorton*      | 2011 |          | No     | Can't tell | Can't tell | Can't tell | Can't tell |
| Perski*      | 2018 |          | Yes    | Yes        | Yes        | Yes        | Yes        |
| Puszkiewitz* | 2016 |          | Yes    | Yes        | Yes        | Yes        | Yes        |
| Taki*        | 2019 |          | Yes    | Yes        | Can't tell | Can't tell | Can't tell |
| Wang*        | 2018 |          | Yes    | Yes        | Yes        | Yes        | Yes        |
| Webcredible* | 2016 |          | No     | No         | Can't tell | Can't tell | Can't tell |

Q 5.1. Is there an adequate rationale for using a mixed methods design to address the research question?

Q 5.2. Are the different components of the study effectively integrated to answer the research question?

Q 5.3. Are the outputs of the integration of qualitative and quantitative components adequately interpreted?

Q 5.4. Are divergences and inconsistencies between quantitative and qualitative results adequately addressed?

Q 5.5. Do the different components of the study adhere to the quality criteria of each tradition of the methods involved?

\*mixed methods studies. Following the instruction of the MMAT guidance the mixed-methods studies first were assessed on their qualitative and quantitative components independently, and finally using the questions 5.1. – 5.5. on their mixed-methods methodology.

**Note: all studies answered 'yes' to the first two screening questions of the MMAT:**

S.1. Are there clear research questions?

S.2. Do the collected data allow to address the research questions?
